# Supplementary material
Source: MDPI journal article supplement (https://www.mdpi.com/2073-4395/12/9/2227)
Supplement: s1 [file s1]

**Table S1.** Soil samples collected from the Bashang region of Hebei Province.

| No. | Location                                                    | Soil<br>Characteristic | Crop            | Collect<br>Time |
|-----|-------------------------------------------------------------|------------------------|-----------------|-----------------|
| 1   | Linsenlin Village, Zhangbei county, Zhangjiakou             | Loamy sand soil        | Cabbage         | 2016            |
| 2   | Linsenlin Village, Zhangbei county, Zhangjiakou             | Loamy sand soil        | Cabbage         | 2017            |
| 3   | Linsenlin Village, Zhangbei county, Zhangjiakou             | Loamy sand soil        | Broccoli        | 2017            |
| 4   | Linsenlin Village, Zhangbei county, Zhangjiakou             | Loamy sand soil        | Cabbage         | 2018            |
| 5   | Linsenlin Village, Zhangbei county, Zhangjiakou             | Loamy sand soil        | Cabbage         | 2019            |
| 6   | Linsenlin Village, Zhangbei county, Zhangjiakou             | Loamy sand soil        | Cabbage         | 2019            |
| 7   | Linsenlin Village, Zhangbei county, Zhangjiakou             | Loamy sand soil        | Broccoli        | 2019            |
| 8   | Linsenlin Village, Zhangbei county, Zhangjiakou             | Loamy sand soil        | Cauliflower     | 2020            |
| 9   | Linsenlin Village, Zhangbei county, Zhangjiakou             | Loamy sand soil        | Cabbage         | 2020            |
| 10  | Linsenlin Village, Zhangbei county, Zhangjiakou             | Loamy sand soil        | Cauliflower     | 2020            |
| 11  | Linsenlin Village, Zhangbei county, Zhangjiakou             | Loamy sand soil        | Broccoli        | 2020            |
| 12  | Linsenlin Village, Zhangbei county, Zhangjiakou             | Loamy sand soil        | Cauliflower     | 2020            |
| 13  | Baishanao Village, Zhangbei county, Zhangjiakou             | Loamy sand soil        | Sugar beet      | 2020            |
| 14  | Baishanao Village, Zhangbei county, Zhangjiakou             | Loamy sand soil        | Sugar beet      | 2020            |
| 15  | Wangbojigou Baishanao Village, Zhangbei county, Zhangjiakou | Loamy sand soil        | Chinese cabbage | 2020            |
| 16  | Wangbojigou Baishanao Village, Zhangbei county, Zhangjiakou | Loamy sand soil        | Chinese cabbage | 2020            |
| 17  | Wangbojigou Baishanao Village, Zhangbei county, Zhangjiakou | Loamy sand soil        | Chinese cabbage | 2020            |
| 18  | Wangbojigou Baishanao Village, Zhangbei county, Zhangjiakou | Loamy sand soil        | Chinese cabbage | 2020            |
| 19  | Wangbojigou Baishanao Village, Zhangbei county, Zhangjiakou | Loamy sand soil        | Chinese cabbage | 2020            |
| 20  | Wangbojigou Baishanao Village, Zhangbei county, Zhangjiakou | Loamy sand soil        | Cabbage         | 2020            |
| 21  | Wangbojigou Baishanao Village, Zhangbei county, Zhangjiakou | Loamy sand soil        | Cabbage         | 2020            |
| 22  | Wangbojigou Baishanao Village, Zhangbei county, Zhangjiakou | Loamy sand soil        | Cabbage         | 2020            |
| 23  | Maliantan Village, Zhangbei county, Zhangjiakou             | Loamy sand soil        | Broccoli        | 2017            |
| 24  | Maliantan Village, Zhangbei county, Zhangjiakou             | Loamy sand soil        | Broccoli        | 2017            |
| 25  | Maliantan Village, Zhangbei county, Zhangjiakou             | Loamy sand soil        | Chinese cabbage | 2018            |
| 26  | Maliantan Village, Zhangbei county, Zhangjiakou             | Loamy sand soil        | Cabbage         | 2018            |
| 27  | Maliantan Village, Zhangbei county, Zhangjiakou             | Loamy sand soil        | Chinese cabbage | 2019            |
| 28  | Maliantan Village, Zhangbei county, Zhangjiakou             | Loamy sand soil        | Chinese cabbage | 2019            |
| 29  | Maliantan Village, Zhangbei county, Zhangjiakou             | Loamy sand soil        | Cauliflower     | 2019            |
| 30  | Maliantan Village, Zhangbei county, Zhangjiakou             | Loamy sand soil        | Cabbage         | 2020            |
| 31  | Maliantan Village, Zhangbei county, Zhangjiakou             | Loamy sand soil        | Cabbage         | 2020            |
| 32  | Maliantan Village, Zhangbei county, Zhangjiakou             | Loamy sand soil        | Broccoli        | 2020            |
| 33  | Maliantan Village, Zhangbei county, Zhangjiakou             | Loamy sand soil        | Broccoli        | 2020            |
| 34  | Maliantan Village, Zhangbei county, Zhangjiakou             | Loamy sand soil        | Broccoli        | 2020            |
| 35  | Maliantan Village, Zhangbei county, Zhangjiakou             | Loamy sand soil        | Cauliflower     | 2020            |
| 36  | Maliantan Village, Zhangbei county, Zhangjiakou             | Loamy sand soil        | Cauliflower     | 2020            |
| 37  | Maliantan Village, Zhangbei county, Zhangjiakou             | Loamy sand soil        | Cauliflower     | 2020            |
| 38  | Maliantan Village, Zhangbei county, Zhangjiakou             | Loamy sand soil        | Cauliflower     | 2020            |
| 39  | Maliantan Village, Zhangbei county, Zhangjiakou             | Loamy sand soil        | Sugar beet      | 2020            |
| 40  | Maliantan Village, Zhangbei county, Zhangjiakou             | Loamy sand soil        | Sugar beet      | 2020            |

All soil samples were collected randomly.

Table S1. *Cont.*

| No. | Location                                             | Soil<br>Characteristic | Crop            | Collect<br>Time |
|-----|------------------------------------------------------|------------------------|-----------------|-----------------|
| 41  | Maliantan Village, Zhangbei county, Zhangjiakou      | Loamy sand soil        | Lettuce         | 2020            |
| 42  | Maliantan Village, Zhangbei county, Zhangjiakou      | Loamy sand soil        | Lettuce         | 2020            |
| 43  | Maliantan Village, Zhangbei county, Zhangjiakou      | Loamy sand soil        | Lettuce         | 2020            |
| 44  | Yongshengchang Village, Zhangbei county, Zhangjiakou | Loamy sand soil        | Chinese cabbage | 2016            |
| 45  | Yongshengchang Village, Zhangbei county, Zhangjiakou | Loamy sand soil        | Cabbage         | 2017            |
| 46  | Yongshengchang Village, Zhangbei county, Zhangjiakou | Loamy sand soil        | Chinese cabbage | 2018            |
| 47  | Yongshengchang Village, Zhangbei county, Zhangjiakou | Loamy sand soil        | Cabbage         | 2019            |
| 48  | Yongshengchang Village, Zhangbei county, Zhangjiakou | Loamy sand soil        | Chinese cabbage | 2019            |
| 49  | Yongshengchang Village, Zhangbei county, Zhangjiakou | Loamy sand soil        | Chinese cabbage | 2020            |
| 50  | Yongshengchang Village, Zhangbei county, Zhangjiakou | Loamy sand soil        | Chinese cabbage | 2020            |
| 51  | Yongshengchang Village, Zhangbei county, Zhangjiakou | Loamy sand soil        | Chinese cabbage | 2020            |
| 52  | Yongshengchang Village, Zhangbei county, Zhangjiakou | Loamy sand soil        | Chinese cabbage | 2020            |
| 53  | Yongshengchang Village, Zhangbei county, Zhangjiakou | Loamy sand soil        | Chinese cabbage | 2020            |
| 54  | Ciershan Village, Zhangbei county, Zhangjiakou       | Loamy soil             | Chinese cabbage | 2020            |
| 55  | Ciershan Village, Zhangbei county, Zhangjiakou       | Loamy soil             | Chinese cabbage | 2020            |
| 56  | Damiaotan Village, Zhangbei county, Zhangjiakou      | Loamy sand soil        | Cabbage         | 2020            |
| 57  | Damiaotan Village, Zhangbei county, Zhangjiakou      | Loamy sand soil        | Cabbage         | 2020            |
| 58  | Xishungou Village, Zhangbei county, Zhangjiakou      | Loamy sand soil        | Chinese cabbage | 2016            |
| 59  | Xishungou Village, Zhangbei county, Zhangjiakou      | Loamy sand soil        | Cabbage         | 2017            |
| 60  | Xishungou Village, Zhangbei county, Zhangjiakou      | Loamy sand soil        | Chinese cabbage | 2018            |
| 61  | Xishungou Village, Zhangbei county, Zhangjiakou      | Loamy sand soil        | Chinese cabbage | 2019            |
| 62  | Xishungou Village, Zhangbei county, Zhangjiakou      | Loamy sand soil        | Chinese cabbage | 2019            |
| 63  | Xishungou Village, Zhangbei county, Zhangjiakou      | Loamy sand soil        | Chinese cabbage | 2019            |
| 64  | Xishungou Village, Zhangbei county, Zhangjiakou      | Loamy sand soil        | Cabbage         | 2019            |
| 65  | Xishungou Village, Zhangbei county, Zhangjiakou      | Loamy sand soil        | Cabbage         | 2020            |
| 66  | Xishungou Village, Zhangbei county, Zhangjiakou      | Loamy sand soil        | Cabbage         | 2020            |
| 67  | Xishungou Village, Zhangbei county, Zhangjiakou      | Loamy sand soil        | Cauliflower     | 2020            |
| 68  | Xishungou Village, Zhangbei county, Zhangjiakou      | Loamy sand soil        | Cauliflower     | 2020            |
| 69  | Xishungou Village, Zhangbei county, Zhangjiakou      | Loamy sand soil        | Cauliflower     | 2020            |
| 70  | Xishungou Village, Zhangbei county, Zhangjiakou      | Loamy sand soil        | Cauliflower     | 2020            |
| 71  | Langwogou Village, Zhangbei county, Zhangjiakou      | Loamy sand soil        | Sugar beet      | 2020            |
| 72  | Langwogou Village, Zhangbei county, Zhangjiakou      | Loamy sand soil        | Sugar beet      | 2020            |
| 73  | Qinjiafang Village, Zhangbei county, Zhangjiakou     | Loamy sand soil        | Sugar beet      | 2020            |
| 74  | Qinjiafang Village, Zhangbei county, Zhangjiakou     | Loamy sand soil        | Sugar beet      | 2020            |
| 75  | Qinjiafang Village, Zhangbei county, Zhangjiakou     | Loamy sand soil        | Sugar beet      | 2020            |
| 76  | Qinjiafang Village, Zhangbei county, Zhangjiakou     | Loamy sand soil        | Broccoli        | 2020            |
| 77  | Qinjiafang Village, Zhangbei county, Zhangjiakou     | Loamy sand soil        | Broccoli        | 2020            |
| 78  | Qinjiafang Village, Zhangbei county, Zhangjiakou     | Loamy sand soil        | Broccoli        | 2020            |
| 79  | Wangjiawan Village, Zhangbei county, Zhangjiakou     | Loamy sand soil        | Broccoli        | 2016            |
| 80  | Wangjiawan Village, Zhangbei county, Zhangjiakou     | Loamy sand soil        | Broccoli        | 2017            |

Table S1. *Cont.*

| No. | Location                                         | Soil<br>Characteristic | Crop            | Collect<br>Time |
|-----|--------------------------------------------------|------------------------|-----------------|-----------------|
| 81  | Wangjiawan Village, Zhangbei county, Zhangjiakou | Loamy sand soil        | Broccoli        | 2020            |
| 82  | Wangjiawan Village, Zhangbei county, Zhangjiakou | Loamy sand soil        | Broccoli        | 2020            |
| 83  | Wangjiawan Village, Zhangbei county, Zhangjiakou | Loamy sand soil        | Broccoli        | 2020            |
| 84  | Wangjiawan Village, Zhangbei county, Zhangjiakou | Loamy sand soil        | Cauliflower     | 2020            |
| 85  | Wangjiawan Village, Zhangbei county, Zhangjiakou | Loamy sand soil        | Cauliflower     | 2020            |
| 86  | Wangjiawan Village, Zhangbei county, Zhangjiakou | Loamy sand soil        | Cauliflower     | 2020            |
| 87  | Lijiaying Village, Zhangbei county, Zhangjiakou  | Loamy sand soil        | Broccoli        | 2017            |
| 88  | Lijiaying Village, Zhangbei county, Zhangjiakou  | Loamy sand soil        | Cauliflower     | 2018            |
| 89  | Lijiaying Village, Zhangbei county, Zhangjiakou  | Loamy sand soil        | Broccoli        | 2020            |
| 90  | Lijiaying Village, Zhangbei county, Zhangjiakou  | Loamy sand soil        | Broccoli        | 2020            |
| 91  | Lijiaying Village, Zhangbei county, Zhangjiakou  | Loamy sand soil        | Broccoli        | 2020            |
| 92  | Lijiaying Village, Zhangbei county, Zhangjiakou  | Loamy sand soil        | Cauliflower     | 2020            |
| 93  | Lijiaying Village, Zhangbei county, Zhangjiakou  | Loamy sand soil        | Chinese cabbage | 2020            |
| 94  | Lijiaying Village, Zhangbei county, Zhangjiakou  | Loamy sand soil        | Chinese cabbage | 2020            |
| 95  | Haojiaying Village, Kangbao county, Zhangjiakou  | Loamy sand soil        | Chinese cabbage | 2020            |
| 96  | Haojiaying Village, Kangbao county, Zhangjiakou  | Loamy sand soil        | Chinese cabbage | 2020            |
| 97  | Tuchengzi Village, Kangbao county, Zhangjiakou   | Loamy sand soil        | Cabbage         | 2019            |
| 98  | Tuchengzi Village, Kangbao county, Zhangjiakou   | Loamy sand soil        | Cabbage         | 2020            |
| 99  | Dasiduan Village, Kangbao county, Zhangjiakou    | Loamy soil             | Cabbage         | 2018            |
| 100 | Dasiduan Village, Kangbao county, Zhangjiakou    | Loamy soil             | Cabbage         | 2020            |
| 101 | Dasiduan Village, Kangbao county, Zhangjiakou    | Loamy soil             | Chinese cabbage | 2020            |
| 102 | Dasiduan Village, Kangbao county, Zhangjiakou    | Loamy soil             | Chinese cabbage | 2020            |
| 103 | Dasiduan Village, Kangbao county, Zhangjiakou    | Loamy soil             | Chinese cabbage | 2020            |
| 104 | Shizhuliang Village, Kangbao county, Zhangjiakou | Loamy sand soil        | Chinese cabbage | 2020            |
| 105 | Shizhuliang Village, Kangbao county, Zhangjiakou | Loamy sand soil        | Chinese cabbage | 2020            |
| 106 | Beiguan Village, Kangbao county, Zhangjiakou     | Loamy sand soil        | Cabbage         | 2020            |
| 107 | Sanqingbo Village, Kangbao county, Zhangjiakou   | Loamy soil             | Cabbage         | 2020            |
| 108 | Sanqingbo Village, Kangbao county, Zhangjiakou   | Loamy soil             | Cabbage         | 2020            |
| 109 | Sanqingbo Village, Kangbao county, Zhangjiakou   | Loamy soil             | Chinese cabbage | 2020            |
| 110 | Sanqingbo Village, Kangbao county, Zhangjiakou   | Loamy soil             | Chinese cabbage | 2020            |
| 111 | Sanqingbo Village, Kangbao county, Zhangjiakou   | Loamy soil             | Chinese cabbage | 2020            |
| 112 | Jiuliancheng Village, Guyuan county, Zhangjiakou | Loamy sand soil        | Chinese cabbage | 2019            |
| 113 | Jiuliancheng Village, Guyuan county, Zhangjiakou | Loamy sand soil        | Chinese cabbage | 2020            |
| 114 | Dayawan Village, Guyuan county, Zhangjiakou      | Loamy sand soil        | Chinese cabbage | 2018            |
| 115 | Dayawan Village, Guyuan county, Zhangjiakou      | Loamy sand soil        | Chinese cabbage | 2020            |
| 116 | Dayawan Village, Guyuan county, Zhangjiakou      | Loamy sand soil        | Chinese cabbage | 2020            |
| 117 | Dayawan Village, Guyuan county, Zhangjiakou      | Loamy sand soil        | Chinese cabbage | 2020            |
| 118 | Sandaogou Village, Guyuan county, Zhangjiakou    | Loamy sand soil        | Cabbage         | 2017            |
| 119 | Sandaogou Village, Guyuan county, Zhangjiakou    | Loamy sand soil        | Cabbage         | 2020            |
| 120 | Hanjiaying Village, Guyuan county, Zhangjiakou   | Loamy sand soil        | Chinese cabbage | 2020            |

Table S1. *Cont.*

| No. | Location                                        | Soil<br>Characteristic | Crop            | Collect<br>Time |
|-----|-------------------------------------------------|------------------------|-----------------|-----------------|
| 121 | Hanjiaying Village, Guyuan county, Zhangjiakou  | Loamy sand soil        | Chinese cabbage | 2020            |
| 122 | Hanjiaying Village, Guyuan county, Zhangjiakou  | Loamy sand soil        | Chinese cabbage | 2020            |
| 123 | Dayingpan Village, Shangyi county, Zhangjiakou  | Loamy sand soil        | Chinese cabbage | 2019            |
| 124 | Dayingpan Village, Shangyi county, Zhangjiakou  | Loamy sand soil        | Chinese cabbage | 2020            |
| 125 | Dayingpan Village, Shangyi county, Zhangjiakou  | Loamy sand soil        | Cabbage         | 2020            |
| 126 | Dayingpan Village, Shangyi county, Zhangjiakou  | Loamy sand soil        | Cabbage         | 2020            |
| 127 | Anjialiang Village, Shangyi county, Zhangjiakou | Loamy sand soil        | Cabbage         | 2020            |
| 128 | Anjialiang Village, Shangyi county, Zhangjiakou | Loamy sand soil        | Cabbage         | 2020            |
| 129 | Anjialiang Village, Shangyi county, Zhangjiakou | Loamy sand soil        | Cabbage         | 2020            |
| 130 | Anjialiang Village, Shangyi county, Zhangjiakou | Loamy sand soil        | Broccoli        | 2020            |
| 131 | Anjialiang Village, Shangyi county, Zhangjiakou | Loamy sand soil        | Broccoli        | 2020            |
| 132 | Anjialiang Village, Shangyi county, Zhangjiakou | Loamy sand soil        | Cauliflower     | 2020            |
| 133 | Anjialiang Village, Shangyi county, Zhangjiakou | Loamy sand soil        | Cauliflower     | 2020            |
| 134 | Chabei management district, Zhangjiakou         | Loamy sand soil        | Chinese cabbage | 2018            |
| 135 | Chabei management district, Zhangjiakou         | Loamy sand soil        | Chinese cabbage | 2020            |
| 136 | Chabei management district, Zhangjiakou         | Loamy sand soil        | Potato          | 2020            |
| 137 | Chabei management district, Zhangjiakou         | Loamy sand soil        | Potato          | 2020            |
| 138 | Saibei management district, Zhangjiakou         | Loamy sand soil        | Chinese cabbage | 2020            |
| 139 | Saibei management district, Zhangjiakou         | Loamy sand soil        | Chinese cabbage | 2020            |
| 140 | Saibei management district, Zhangjiakou         | Loamy sand soil        | Potato          | 2020            |
| 141 | Saibei management district, Zhangjiakou         | Loamy sand soil        | Potato          | 2020            |
| 142 | Weichang manchu autonomous county, Chengde      | Loamy sand soil        | Carrot          | 2018            |
| 143 | Weichang manchu autonomous county, Chengde      | Loamy sand soil        | Carrot          | 2018            |
| 144 | Weichang manchu autonomous county, Chengde      | Loamy sand soil        | Chinese cabbage | 2020            |
| 145 | Weichang manchu autonomous county, Chengde      | Loamy sand soil        | Chinese cabbage | 2020            |
| 146 | Weichang manchu autonomous county, Chengde      | Loamy sand soil        | Chinese cabbage | 2020            |
| 147 | Weichang manchu autonomous county, Chengde      | Loamy sand soil        | Carrot          | 2020            |
| 148 | Weichang manchu autonomous county, Chengde      | Loamy sand soil        | Carrot          | 2020            |
| 149 | Weichang manchu autonomous county, Chengde      | Loamy sand soil        | Carrot          | 2020            |
| 150 | Weichang manchu autonomous county, Chengde      | Loamy soil             | Carrot          | 2020            |
| 151 | Weichang manchu autonomous county, Chengde      | Loamy soil             | Potato          | 2020            |
| 152 | Weichang manchu autonomous county, Chengde      | Loamy sand soil        | Potato          | 2020            |
| 153 | Weichang manchu autonomous county, Chengde      | Loamy sand soil        | Potato          | 2020            |
| 154 | Fengning manchu autonomous county, Chengde      | Loamy sand soil        | Chinese cabbage | 2020            |
| 155 | Fengning manchu autonomous county, Chengde      | Loamy sand soil        | Chinese cabbage | 2020            |
| 156 | Fengning manchu autonomous county, Chengde      | Loamy sand soil        | Potato          | 2020            |
| 157 | Fengning manchu autonomous county, Chengde      | Loamy soil             | Potato          | 2020            |
| 158 | Fengning manchu autonomous county, Chengde      | Loamy soil             | Potato          | 2020            |

**Table S2.** Morphometrical comparisons of cysts and second-stage juveniles (J2s) of SCN between Bashang populations and other populations.

| Character             | ZM<br>Population                | KM<br>Population                | CB<br>Population                 | FN<br>Population                 | Japan SCN<br>Ichinohe [37] | Gansu, Ningxia<br>SCN Peng et al.[3] |
|-----------------------|---------------------------------|---------------------------------|----------------------------------|----------------------------------|----------------------------|--------------------------------------|
| Cyst ( <i>n</i> )     | 20                              | 20                              | 20                               | 20                               | 100                        | 20                                   |
| Cyst length           | 666.75±79.79<br>(548.48-820.11) | 692.57±70.60<br>(559.95-804.64) | 661.38±109.12<br>(528.59-853.27) | 619.16±102.81<br>(462.87-799.92) | 690<br>(560-870)           | -                                    |
| Cyst width            | 388.56±83.32<br>(243.01-522.94) | 420.16±61.44<br>(302.25-518.75) | 484.34±77.23<br>(350.33-611.79)  | 361.31±66.58<br>(266.29-489.46)  | 489<br>(350-670)           | -                                    |
| Fenestral<br>length   | 50.35±5.53<br>(40.91-57.57)     | 50.76±4.88<br>(41.11-56.73)     | 50.86±5.12<br>(40.01-57.38)      | 45.64±4.11<br>(40.01-54.37)      | -                          | 52.7±4.5<br>(39.8-56.1)              |
| Fenestral<br>width    | 37.94±4.38<br>(31.82-45.10)     | 35.74±3.64<br>(31.33-42.24)     | 34.18±3.24<br>(31.82-43.42)      | 37.47±2.56<br>(32.87-42.98)      | -                          | 37.4±4.3<br>(31.8-43.2)              |
| Underbridge<br>length | 93.36±7.18<br>(80.78-105.79)    | 97.03±9.39<br>(82.99-114.11)    | 91.45±12.96<br>(77.47-116.41)    | 89.88±8.08<br>(78.84-107.21)     | -                          | 88±10.2<br>(77.8-116.7)              |
| Vulval slit<br>length | 47.26±3.69<br>(40.80-52.89)     | 45.09±3.20<br>(41.22-51.66)     | 46.66±3.61<br>(40.96-51.98)      | 47.69±3.20<br>(42.82-51.54)      | -                          | 44±3.1<br>(40.6-51.8)                |
| J2 ( <i>n</i> )       | 20                              | 20                              | 20                               | 20                               | 100                        | 35                                   |
| Body length           | 419.25±22.45<br>(399.99-433.69) | 423.39±11.44<br>(400.59-434.34) | 426.80±7.93<br>(404.19-434.47)   | 429.15±15.90<br>(403.26-453.99)  | 471<br>(437-504)           | 418±15.8<br>(398.2-435.7)            |
| Body width            | 21.69±1.14<br>(20.60-22.15)     | 21.74±0.94<br>(20.84-22.33)     | 21.28±1.02<br>(20.97-22.11)      | 21.41±0.99<br>(20.90-22.80)      | 18.3<br>(18.0-18.5)        | -                                    |
| Stylet                | 23.64±1.23<br>(22.68-24.83)     | 23.77±0.89<br>(22.85-24.48)     | 23.81±0.81<br>(22.59-24.93)      | 23.98±0.76<br>(22.38-24.77)      | 23.1                       | 23±0.2<br>(22.6-24.8)                |
| a                     | 21.09±1.17<br>(19.70-22.48)     | 21.58±1.48<br>(19.03-23.49)     | 21.55±1.61<br>(19.88-24.21)      | 20.34±1.03<br>(19.24-21.98)      | -                          | -                                    |
| b                     | 4.21±0.25<br>(3.78-4.47)        | 4.33±0.47<br>(3.67-4.58)        | 4.22±0.46<br>(3.66-4.35)         | 4.45±0.35<br>(3.97-4.64)         | -                          | -                                    |
| c                     | 9.69±0.47<br>(7.78-10.10)       | 9.21±0.38<br>(7.67-9.86)        | 9.34±0.45<br>(8.26-9.99)         | 9.45±0.47<br>(8.57-10.28)        | -                          | -                                    |
| Tail length           | 47.03±2.76<br>(45.47-49.88)     | 46.40±2.80<br>(44.72-50.33)     | 46.80±1.27<br>(45.03-51.07)      | 46.57±1.44<br>(44.89-51.11)      | 45<br>(42-47)              | 48±3.1<br>(44.7-51.2)                |
| Hyaline<br>length     | 27.83±1.55<br>(26.91-28.48)     | 27.69±1.61<br>(25.01-29.77)     | 27.90±1.67<br>(24.38-29.47)      | 28.58±2.21<br>(25.33-29.96)      | -                          | 27.1±1.5<br>(24.1-30.3)              |
| Eggs ( <i>n</i> )     | 100                             | 100                             | 100                              | 100                              | -                          | -                                    |
| Length                | 118.46±6.45<br>(102.44-129.41)  | 117.00±8.84<br>(93.41-134.73)   | 109.83±6.50<br>(94.30-128.38)    | 112.32±5.65<br>(98.07-126.67)    | -                          | -                                    |
| Width                 | 46.70±4.39<br>(36.55-61.74)     | 46.32±5.79<br>(32.57-59.08)     | 43.17±2.79<br>(37.90-50.68)      | 44.23±3.63<br>(39.78-54.06)      | -                          | -                                    |

All measurements are in  $\mu\text{m}$ , and data are mean±SD with the range in the bracket. (n=number of specimens, a=body length/greatest body width, b=body length/distance from anterior end to junction of pharynx and intestine, c=body length/tail length).

**Table S3.** Morphometrical comparisons of cysts and second-stage juveniles (J2s) of SBCN between ZZ population and other populations.

| Character             | ZZ<br>Population                | Xinjiang, SBCN<br>Peng et al. [20] | Turkey, SBCN<br>Cui et al. [38] | Korea, SBCN<br>Mwamula et al. [39] | USA, SBCN<br>Nelson et al. [17] |
|-----------------------|---------------------------------|------------------------------------|---------------------------------|------------------------------------|---------------------------------|
| Cysts ( <i>n</i> )    | 20                              | 20                                 | 12                              | 20                                 | 26                              |
| Cyst length           | 831.71±49.41<br>(700.83-874.96) | 752±87.2<br>(622.0-867.4)          | 700.3±80.1<br>(610-783)         | 795.8±97.1<br>(639.5-882.6)        | 701.2<br>(600-850)              |
| Cyst width            | 476.42±67.77<br>(384.40-493.45) | 485.2±55.3<br>(391.1-594.1)        | 459.8±52.2<br>(395-505)         | 510.8±75.1<br>(378.5-600.4)        | 469.2<br>(350-580)              |
| Fenestral length      | 38.68±3.79<br>(32.63-42.62)     | 37.2±5.5<br>(32.5-43.5)            | -                               | 42.2±3.6<br>(36.1-45.3)            | -                               |
| Fenestral width       | 38.02±3.28<br>(32.42-43.19)     | 27.9±4.5<br>(22.4-37.9)            | -                               | 28.2±4.0<br>(24.3-33.8)            | -                               |
| Underbridge<br>length | 97.09±8.74<br>(77.85-112.73)    | 105.4±9.9<br>(88.1-116.7)          | 113.3±10.4<br>(98-120)          | 102.3±10.8<br>(93.7-120.8)         | -                               |
| Vulval slit length    | 45.12±3.26<br>(40.83-51.38)     | 40.2±4.4<br>(37.2-48.9)            | 43.9±1.9<br>(41-45)             | 37.4±5.2<br>(30.3-42.2)            | -                               |
| J2 ( <i>n</i> )       | 20                              | 26                                 | 20                              | 20                                 | 21                              |
| Body length           | 435.73±11.21<br>(401.88-444.32) | 442.1±13.7<br>(429.2-512.3)        | -                               | 484.2±11.1<br>(473.0-504.2)        | 437.1<br>(400-485)              |
| Body width            | 21.28±0.54<br>(20.37-22.78)     | 19.7±0.9<br>(18.2-21.2)            | -                               | 20.3±0.9<br>(19.1-21.8)            | -                               |
| Stylet                | 24.83±0.46<br>(22.78-24.59)     | 24.2±0.5<br>(22.3-26.5)            | 24.3±0.5<br>(24-25)             | 22.1±0.9<br>(21.3-24.3)            | 25                              |
| a                     | 22.03±1.25<br>(20.17-24.33)     | 23.7±1.1<br>(22.2-24.8)            | -                               | 23.8±0.9<br>(22.9-25.1)            | -                               |
| b                     | 4.34±0.33<br>(3.64-4.70)        | 4.5±0.3<br>(4.1-4.7)               | -                               | 4.2±0.1<br>(3.7-4.6)               | -                               |
| c                     | 9.50±0.33<br>(8.64-10.73)       | 9.8±0.6<br>(8.9-10.1)              | -                               | 9.6±0.4<br>(9.4-10.0)              | -                               |
| Tail length           | 48.25±2.25<br>(44.98-53.75)     | 50.8±2.1<br>(47.5-52.7)            | 47.0±1.4<br>(45-49)             | 49.9±1.8<br>(48.2-53.2)            | 46.6<br>(37.5-55.0)             |
| Hyaline length        | 34.82±2.71<br>(32.12-35.80)     | 27.8±2.7<br>(24.7-30.9)            | 24.0±0.6<br>(23-25)             | 29.2±2.1<br>(26.7-34.3)            | 27.3<br>(20-32.5)               |
| Eggs ( <i>n</i> )     | 100                             | -                                  | -                               | -                                  | -                               |
| Length                | 124.22±6.34<br>(102.78-132.44)  | -                                  | -                               | -                                  | -                               |
| Width                 | 54.11±3.89<br>(45.24-65.99)     | -                                  | -                               | -                                  | -                               |

All measurements are in µm, and data are mean±SD with the range in the bracket. (n=number of specimens, a=body length/greatest body width, b=body length/distance from anterior end to junction of pharynx and intestine, c=body length/tail length).
